# Supplementary material for: Functional Annotation of Caenorhabditis elegans Genes by Analysis of Gene Co-Expression Networks
Source: MDPI journal article supplement (doi:10.3390/biom8030070), 2018-08-03
Supplement: s1 [file s1]

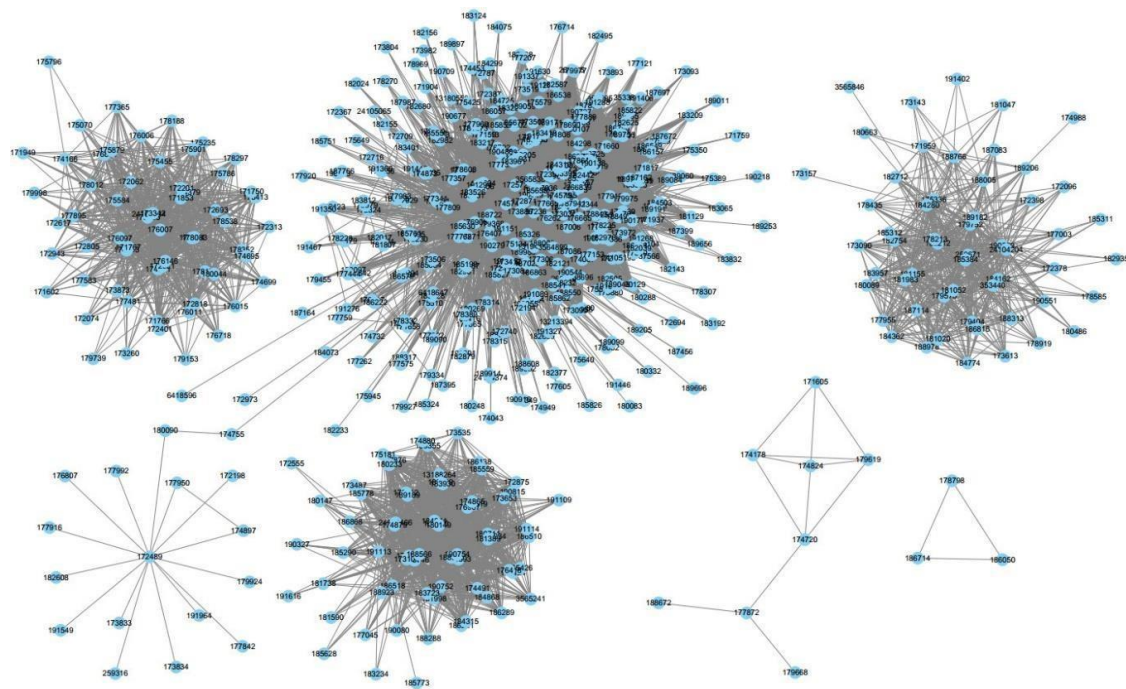

**Figure S1.** *C. elegans* gene co-expression network. Each node represents a gene, and each line denotes the gene expression correlation between the two nodes.

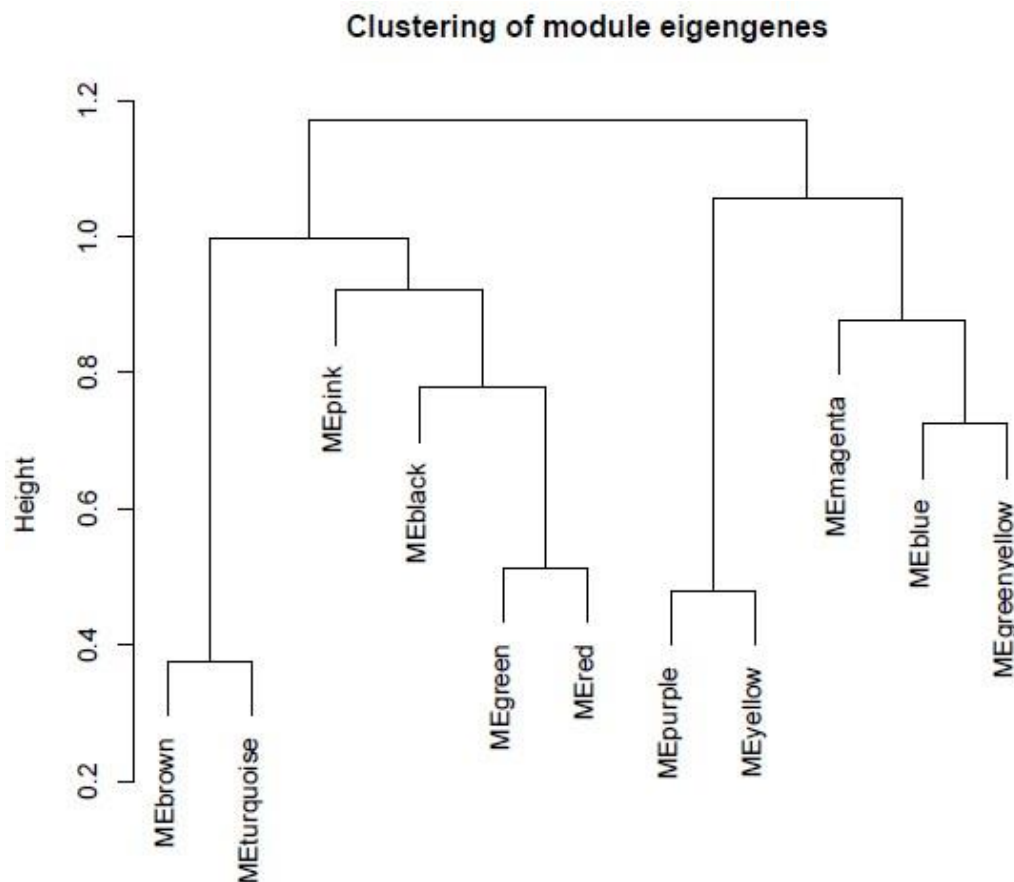

**Figure S2.** A clustering diagram representing the relationships between meta-modules (the higher order module).
